# Supplementary material for: Genome-wide investigation and expression pattern of PHR family genes in cotton under low phosphorus stress
Source: PeerJ. 2022 Dec 15;10:e14584. doi: 10.7717/peerj.14584 (PMC9760022; doi:10.7717/peerj.14584)
Supplement: Supplemental Information 2 [file peerj-10-14584-s002.xlsx]

## Sheet: Sheet1
Sample Name	Gene Name	Cq	Cq Mean	Cq Error
0d	GhPHR1	22.32	22.31	0.01
0d	GhPHR1	22.3	22.31	0.01
0d	GhPHR1	22.31	22.31	0.01
0d	GhPHR6	22.42	22.57	0.15
0d	GhPHR6	22.57	22.57	0.15
0d	GhPHR6	22.71	22.57	0.15
0d	GhPHR11	21.3	21.35	0.07
0d	GhPHR11	21.33	21.35	0.07
0d	GhPHR11	21.43	21.35	0.07
0d	GhPHR18	24.35	24.48	0.2
0d	GhPHR18	24.37	24.48	0.2
0d	GhPHR18	24.71	24.48	0.2
0d	GhPHR30	25.21	25.2	0.08
0d	GhPHR30	25.12	25.2	0.08
0d	GhPHR30	25.27	25.2	0.08
0d	GhPHR38	24.59	24.65	0.07
0d	GhPHR38	24.62	24.65	0.07
0d	GhPHR38	24.73	24.65	0.07
0d	UBQ	18.42	18.5	0.07
0d	UBQ	18.48	18.5	0.07
0d	UBQ	18.51	18.5	0.07
0d	UBQ	18.58	18.5	0.07
15d-NP	GhPHR1	22.26	22.27	0.04
15d-NP	GhPHR1	22.24	22.27	0.04
15d-NP	GhPHR1	22.31	22.27	0.04
15d-NP	GhPHR6	23.2	23.17	0.04
15d-NP	GhPHR6	23.12	23.17	0.04
15d-NP	GhPHR6	23.19	23.17	0.04
15d-NP	GhPHR11	21.81	21.85	0.09
15d-NP	GhPHR11	21.78	21.85	0.09
15d-NP	GhPHR11	21.95	21.85	0.09
15d-NP	GhPHR18	24.94	24.92	0.09
15d-NP	GhPHR18	24.82	24.92	0.09
15d-NP	GhPHR18	25	24.92	0.09
15d-NP	GhPHR30	25.91	25.98	0.14
15d-NP	GhPHR30	25.89	25.98	0.14
15d-NP	GhPHR30	26.14	25.98	0.14
15d-NP	GhPHR38	25.02	25.09	0.16
15d-NP	GhPHR38	24.98	25.09	0.16
15d-NP	GhPHR38	25.27	25.09	0.16
15d-NP	UBQ	19.77	19.71	0.13
15d-NP	UBQ	19.56	19.71	0.13
15d-NP	UBQ	19.66	19.71	0.13
15d-NP	UBQ	19.85	19.71	0.13
15d-LP	GhPHR1	22.75	22.84	0.08
15d-LP	GhPHR1	22.91	22.84	0.08
15d-LP	GhPHR1	22.86	22.84	0.08
15d-LP	GhPHR6	21.52	21.65	0.13
15d-LP	GhPHR6	21.67	21.65	0.13
15d-LP	GhPHR6	21.77	21.65	0.13
15d-LP	GhPHR11	22.05	22.12	0.06
15d-LP	GhPHR11	22.13	22.12	0.06
15d-LP	GhPHR11	22.17	22.12	0.06
15d-LP	GhPHR18	23.67	23.76	0.13
15d-LP	GhPHR18	23.7	23.76	0.13
15d-LP	GhPHR18	23.9	23.76	0.13
15d-LP	GhPHR30	24.22	24.28	0.15
15d-LP	GhPHR30	24.18	24.28	0.15
15d-LP	GhPHR30	24.45	24.28	0.15
15d-LP	GhPHR38	23.86	23.94	0.11
15d-LP	GhPHR38	24.07	23.94	0.11
15d-LP	GhPHR38	23.9	23.94	0.11
15d-LP	UBQ	18.66	18.78	0.1
15d-LP	UBQ	18.83	18.78	0.1
15d-LP	UBQ	18.84	18.78	0.1
